# Supplementary material for: Oropharyngeal microbiome profiled at admission is predictive of the need for respiratory support among COVID-19 patients
Source: PubMed Central journal article supplement (PMC9561819; doi:10.3389/fmicb.2022.1009440), 2022-09-30
Supplement: Table_5.pdf [file Table_5.pdf]

1

| Model               | seed   | TP    | FP    | TN   | FN   | sensitivity | specificity | precision | accuracy | F1   |
|---------------------|--------|-------|-------|------|------|-------------|-------------|-----------|----------|------|
| Pathway Abundance   | 111.00 | 33.00 | 11.00 | 1.00 | 5.00 | 0.87        | 0.08        | 0.75      | 0.68     | 0.80 |
| Pathway Abundance   | 112.00 | 34.00 | 12.00 | 0.00 | 4.00 | 0.89        | 0.00        | 0.74      | 0.68     | 0.81 |
| Pathway Abundance   | 113.00 | 34.00 | 12.00 | 0.00 | 4.00 | 0.89        | 0.00        | 0.74      | 0.68     | 0.81 |
| Pathway Abundance   | 114.00 | 33.00 | 11.00 | 1.00 | 5.00 | 0.87        | 0.08        | 0.75      | 0.68     | 0.80 |
| Pathway Abundance   | 115.00 | 32.00 | 12.00 | 0.00 | 6.00 | 0.84        | 0.00        | 0.73      | 0.64     | 0.78 |
| Pathway Abundance   | 116.00 | 33.00 | 11.00 | 1.00 | 5.00 | 0.87        | 0.08        | 0.75      | 0.68     | 0.80 |
| Pathway Abund. + CC | 111.00 | 34.00 | 11.00 | 1.00 | 4.00 | 0.89        | 0.08        | 0.76      | 0.70     | 0.82 |
| Pathway Abund. + CC | 112.00 | 35.00 | 10.00 | 2.00 | 3.00 | 0.92        | 0.17        | 0.78      | 0.74     | 0.84 |
| Pathway Abund. + CC | 113.00 | 34.00 | 11.00 | 1.00 | 4.00 | 0.89        | 0.08        | 0.76      | 0.70     | 0.82 |
| Pathway Abund. + CC | 114.00 | 34.00 | 10.00 | 2.00 | 4.00 | 0.89        | 0.17        | 0.77      | 0.72     | 0.83 |
| Pathway Abund. + CC | 115.00 | 34.00 | 11.00 | 1.00 | 4.00 | 0.89        | 0.08        | 0.76      | 0.70     | 0.82 |
| Pathway Abund. + CC | 116.00 | 34.00 | 10.00 | 2.00 | 4.00 | 0.89        | 0.17        | 0.77      | 0.72     | 0.83 |

2
